# Supplementary material
Source: publisher site journal article supplement (https://www.spandidos-publications.com/2687/downloadSupplementary)
Supplement: Supplementary file 1 [file downloadSupplementary]

## Sheet: Sheet1
Table SII. Clinical information of patients in the operating room.
ID	Overall survival time after operation, years	State	Sex	WHO Grade	Age, years	PRS type	Complete resection	KPS	Radio status	Chemo status	Histology
Patient 1	1.59178	1	Male	WHO IV	>50	Primary	Yes	30	Yes	Yes	GBM
Patient 2	0.493151	1	Female	WHO IV	≤50	Recurrent	No	50	No	No	GBM
Patient 3	0.0824176	1	Female	WHO IV	≤50	Recurrent	No	50	No	No	GBM
Patient 4	0.0575342	1	Female	WHO IV	>50	Recurrent	Yes	50	Yes	Yes	GBM
Patient 5	0.493151	1	Female	WHO IV	>50	Primary	Yes	50	Yes	Yes	GBM
Patient 6	NA	NA	Female	NA	>50	NA	NA	65	No	No	Epilepsy
Patient 7	NA	NA	Female	NA	<=50	NA	NA	50	No	No	Epilepsy
Patient 8	NA	NA	Male	NA	>50	NA	NA	55	No	No	Epilepsy
Patient 9	NA	NA	Female	NA	≤50	NA	NA	60	No	No	Epilepsy
Patient 10	NA	NA	Male	NA	≤50	NA	NA	60	No	No	Epilepsy
WHO, World Health Organisation; PRS, Primary Recurrent Secondary; KPS, Karnofsky Performance Status; GBM, glioblastoma.
